# Supplementary material
Source: Springer Nature journal article supplement (https://www.springermedizin.de/resource/supplementary/12885_2012_3716_MOESM5_ESM.pdf/9465920)

Small spheroids

Large spheroids

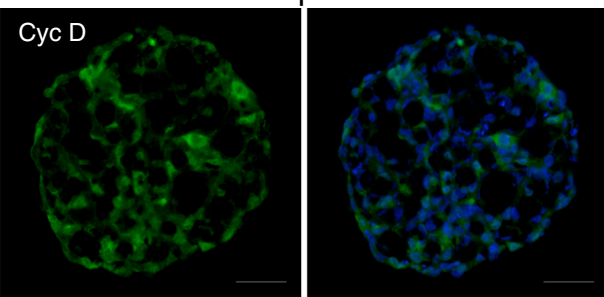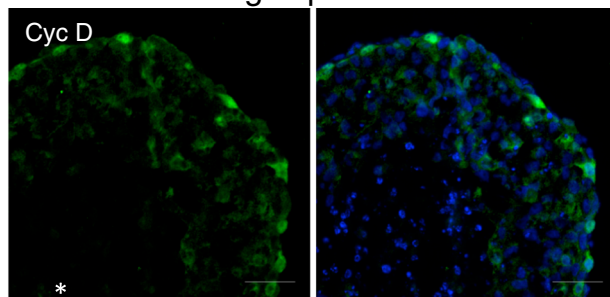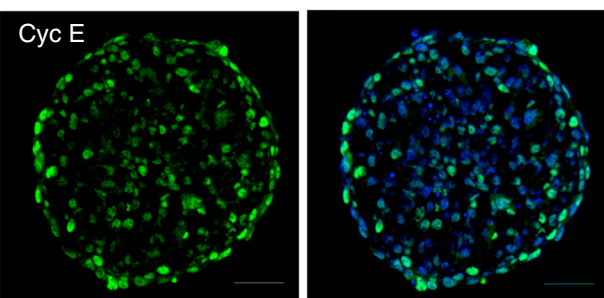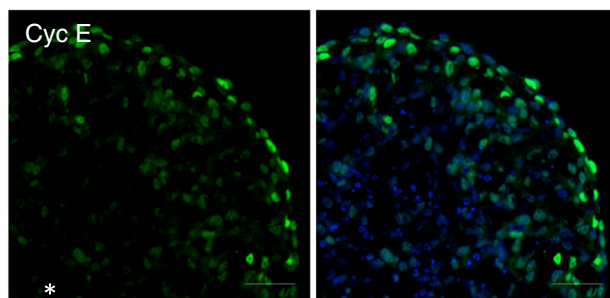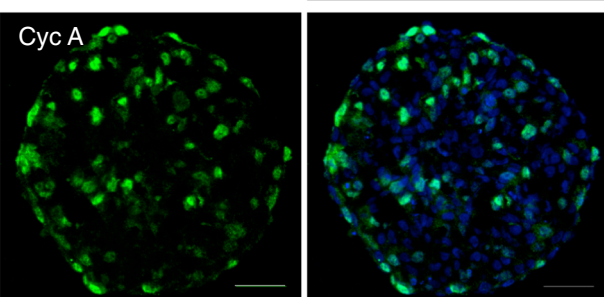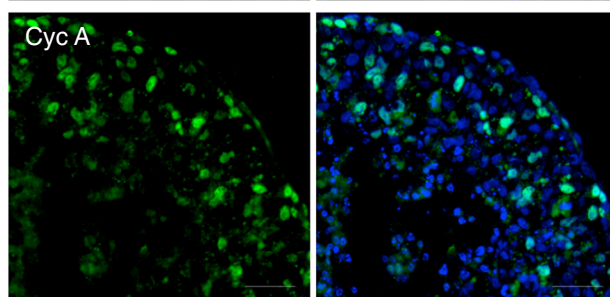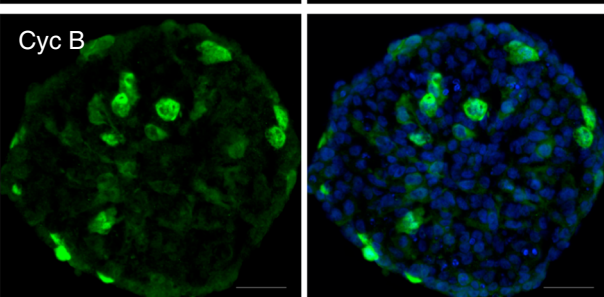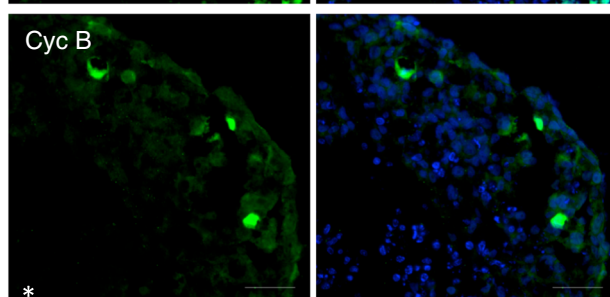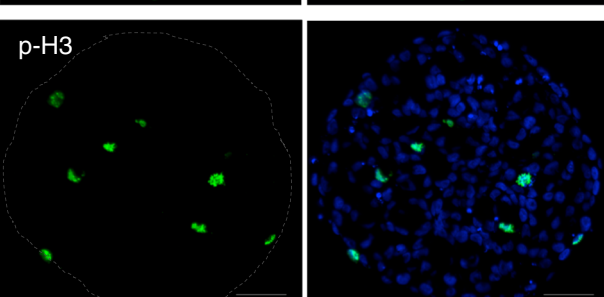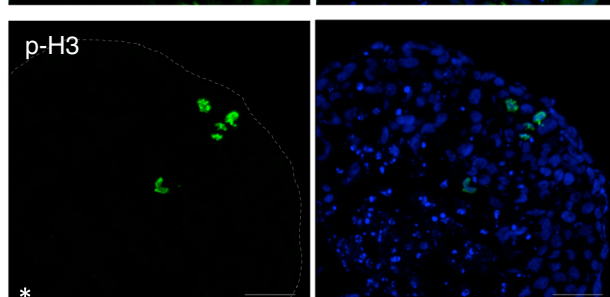

Merge with DAPI

Merge with DAPI

Supplement: MOESM5 [file 9465920]
